# Supplementary material
Source: ML conference proceedings conference paper supplement (https://openaccess.thecvf.com/content/CVPR2024/html/Taubner_3D_Face_Tracking_CVPR_2024_paper.html)
Supplement: Supplementary file 2 [file Taubner_3D_Face_Tracking_CVPR_2024_supplemental.zip]

Archive with 5 entries (5 files):
- flowface_cvpr_2024_supplementary/avatar_synthesis_compare.mp4
- flowface_cvpr_2024_supplementary/expression_transfer.mp4
- flowface_cvpr_2024_supplementary/extreme_expressions.mp4
- flowface_cvpr_2024_supplementary/flowface_cvpr_2024_supp.pdf
- flowface_cvpr_2024_supplementary/mead_tracking.mp4
